# Supplementary material for: Slow magnetization relaxation of a high-spin iron(iii) in mayenite Ca12Al14O33
Source: Royal Society of Chemistry journal article supplement (doi:10.1039/d4qi00480a), 2024-01-01
Supplement: d4qi00480a1.pdf [file d4qi00480a1.pdf]

## **Slow magnetization relaxation of a high-spin iron(III) in mayenite $\text{Ca}_{12}\text{Al}_{14}\text{O}_{33}$ .**

Timur Z. Sharifullin,<sup>a</sup> Alexander V. Vasiliev,<sup>a</sup> Vladimir D. Dolzhenko,<sup>a</sup> Sebastian Bette,<sup>b</sup> Robert E. Dinnebier,<sup>b</sup> Reinhard K. Kremer,<sup>b</sup> Pavel E. Kazin\*<sup>a</sup>

<sup>a</sup>Department of Chemistry, Lomonosov Moscow State University, 119991 Moscow, Russia. E-mail: kazin@inorg.chem.msu.ru; Tel: +7 495 9393440

<sup>b</sup>Max Planck Institute for Solid State Research, Heisenbergstrasse 1, 70569 Stuttgart, Germany

**Supporting information**

## X-ray powder diffraction data

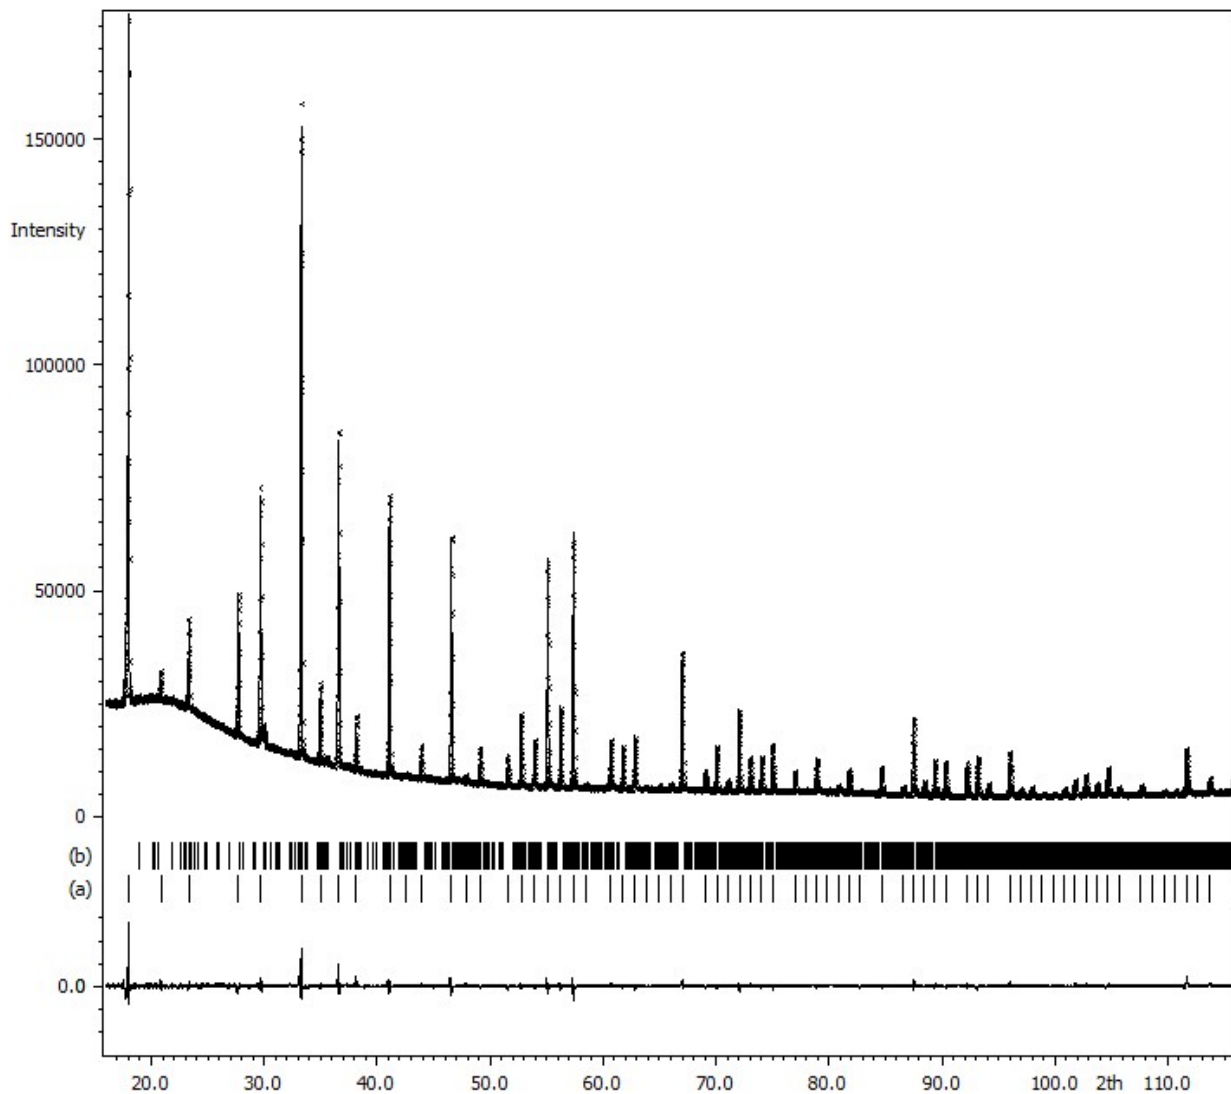

**Figure S1.** Powder X-ray diffraction pattern of  $\text{Ca}_{12}\text{Al}_{14}\text{O}_{33}$  (Sample CAF0). Observed (crosses), calculated (solid line) and difference (solid line below) plots. Positions of Bragg reflections are indicated by vertical bars underneath. (a) the main phase; (b) admixture of  $\text{CaAl}_2\text{O}_4$ , 3.9 wt. %.

**Table S1.** Crystal structure refinement data for CAF0.

|                                                                            |                                 |
|----------------------------------------------------------------------------|---------------------------------|
| Temperature (K)                                                            | 293 K                           |
| Wavelength (Å)                                                             | 1.5406                          |
| Space group                                                                | <i>I</i> -43 <i>d</i> (no. 220) |
| <i>a</i> (Å)                                                               | 11.9902(1)                      |
| <i>V</i> (Å <sup>3</sup> )                                                 | 1723.75(1)                      |
| <i>Z</i>                                                                   | 2                               |
| 2θ range (deg.)                                                            | 16 – 116                        |
| <i>R</i> <sub>wp</sub>                                                     | 0.023                           |
| <i>R</i> <sub>all</sub>                                                    | 0.019                           |
| Δ <i>F</i> <sub>max</sub> , Δ <i>F</i> <sub>min</sub> (e Å <sup>-3</sup> ) | 0.19, -0.23                     |

**Table S2.** Atomic parameters and thermal displacement parameters (Å<sup>2</sup>) for CAF0.

| Atom | Wyck.       | Occ.     | <i>x</i>    | <i>y</i>    | <i>z</i>    | <i>U</i> <sub>iso</sub> |
|------|-------------|----------|-------------|-------------|-------------|-------------------------|
| Ca1  | 24 <i>d</i> | 0.89(1)  | 0.8901(3)   | 0           | 3/4         | 0.0063(7)               |
| Al1  | 16 <i>c</i> |          | 0.01824(13) | 0.01824(13) | 0.01824(13) | 0.0112(9)               |
| Al2  | 12 <i>b</i> |          | 1.0         | -1/4        | 5/8         | 0.0058(9)               |
| O1   | 16 <i>c</i> |          | 0.9362(3)   | -0.0638(3)  | 0.9362(3)   | 0.009(2)                |
| O2   | 48 <i>e</i> |          | 0.9012(3)   | -0.1925(2)  | 0.7133(3)   | 0.0079(10)              |
| O3   | 48 <i>e</i> | 0.020(3) | 0.77(3)     | 0.12(2)     | -0.052(14)  | 0.03                    |
| Ca2  | 24 <i>d</i> | 0.11(1)  | 0.946(3)    | 0           | 3/4         | 0.022(8)                |

**Table S3.** Selected interatomic distances (Å) in the crystal structure of CAF0.

|            |          |    |
|------------|----------|----|
| Ca1-O1     | 2.424(4) | 2x |
| Ca1-O2     | 2.354(3) | 2x |
| Ca1-O2     | 2.524(5) | 2x |
| Ca2-O1     | 2.363(4) | 2x |
| Ca2-O2     | 2.410(8) | 2x |
| Ca2-O3     | 2.2(3)   |    |
| Al1-O1     | 1.703(4) |    |
| Al1-O2     | 1.788(4) | 3x |
| Al2-O2     | 1.732(3) | 4x |
| Al1-O(av.) | 1.767    |    |

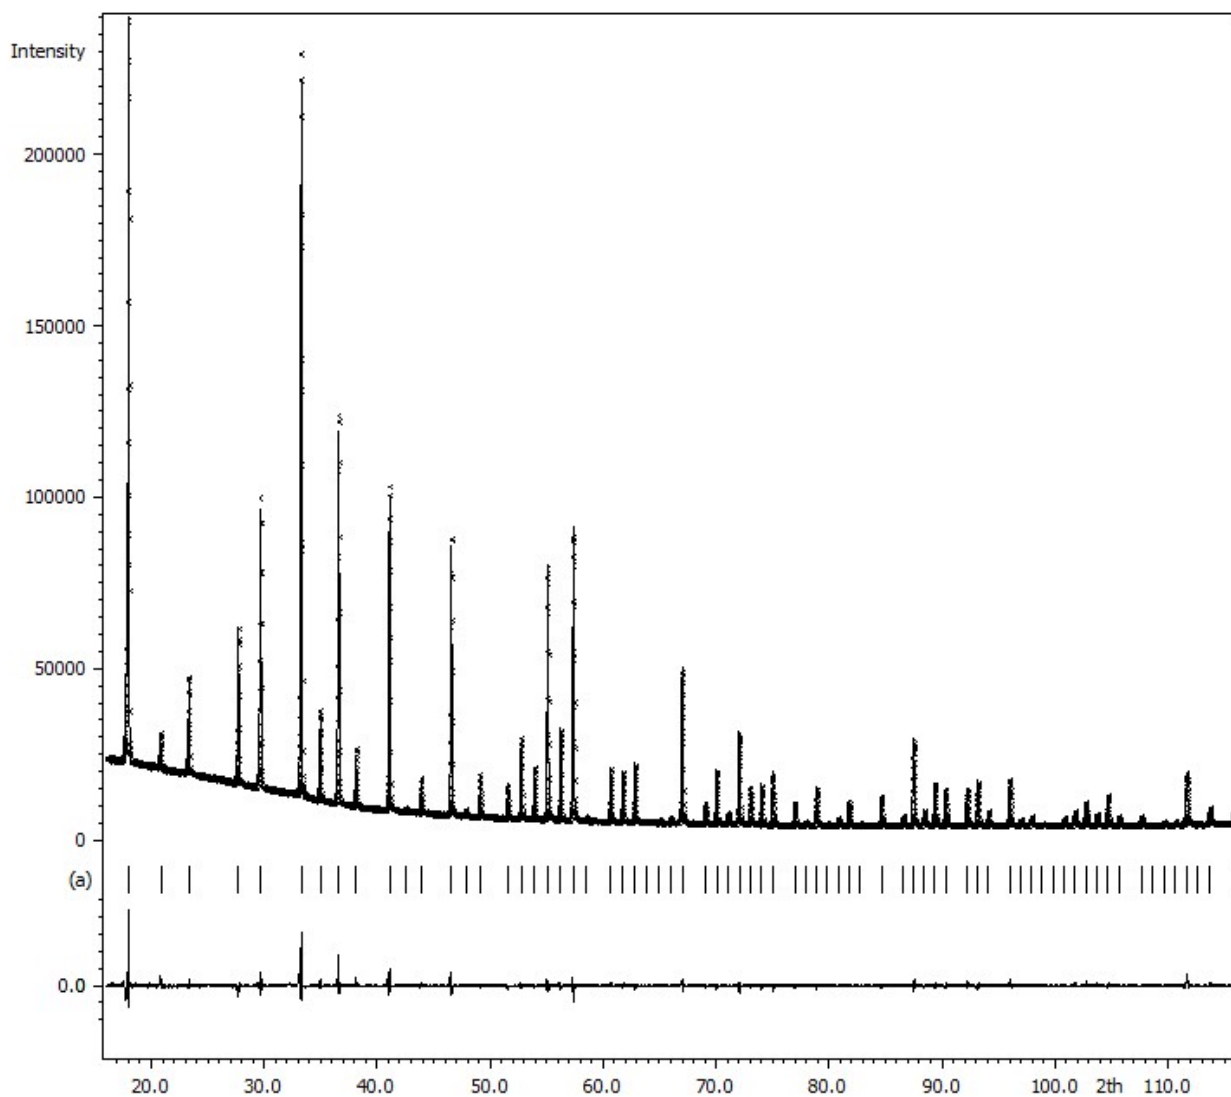

**Figure S2.** Powder X-ray diffraction pattern of  $\text{Ca}_{12}\text{Al}_{13.95}\text{Fe}_{0.05}\text{O}_{33}$  (Sample CAF5). Observed (crosses), calculated (solid line) and difference (solid line below) plots. Positions of Bragg reflections are indicated by vertical bars underneath.

**Table S4.** Crystal structure refinement data for CAF5.

|                                                                            |                                 |
|----------------------------------------------------------------------------|---------------------------------|
| Temperature (K)                                                            | 293 K                           |
| Wavelength (Å)                                                             | 1.5406                          |
| Space group                                                                | <i>I</i> -43 <i>d</i> (no. 220) |
| <i>a</i> (Å)                                                               | 11.9895(1)                      |
| <i>V</i> (Å <sup>3</sup> )                                                 | 1723.45(1)                      |
| <i>Z</i>                                                                   | 2                               |
| 2θ range (deg.)                                                            | 16 – 116                        |
| <i>R</i> <sub>wp</sub>                                                     | 0.030                           |
| <i>R</i> <sub>all</sub>                                                    | 0.018                           |
| Δ <i>F</i> <sub>max</sub> , Δ <i>F</i> <sub>min</sub> (e Å <sup>-3</sup> ) | 0.17, -0.19                     |

**Table S5.** Atomic parameters and thermal displacement parameters (Å<sup>2</sup>) for CAF5.

| Atom | Wyck.       | Occ.     | <i>x</i>    | <i>y</i>    | <i>z</i>    | <i>U</i> <sub>iso</sub> |
|------|-------------|----------|-------------|-------------|-------------|-------------------------|
| Ca1  | 24 <i>d</i> | 0.87(1)  | 0.8892(4)   | 0           | 3/4         | 0.0056(8)               |
| Al1  | 16 <i>c</i> | 0.994    | 0.01809(12) | 0.01809(12) | 0.01809(12) | 0.0093(9)               |
| Al2  | 12 <i>b</i> |          | 1.00000     | -1/4        | 5/8         | 0.0059(9)               |
| O1   | 16 <i>c</i> |          | 0.9359(3)   | -0.0641(3)  | 0.9359(3)   | 0.008(2)                |
| O2   | 48 <i>e</i> |          | 0.9006(3)   | -0.1929(3)  | 0.7131(3)   | 0.0077(10)              |
| O3   | 48 <i>e</i> | 0.033(4) | 0.771(15)   | 0.119(13)   | -0.062(9)   | 0.0300                  |
| Ca2  | 24 <i>d</i> | 0.13(1)  | 0.942(3)    | 0           | 3/4         | 0.025(7)                |
| Fe1  | 16 <i>c</i> | 0.006    | 0.01809(12) | 0.01809(12) | 0.01809(12) | 0.0093(9)               |

**Table S6.** Selected interatomic distances (Å) in the crystal structure of CAF5.

|                 |          |    |
|-----------------|----------|----|
| Ca1-O1          | 2.423(4) | 2x |
| Ca1-O2          | 2.358(3) | 2x |
| Ca1-O2          | 2.519(5) | 2x |
| Ca2-O1          | 2.359(4) | 2x |
| Ca2-O2          | 2.407(8) | 2x |
| Ca2-O3          | 2.3(2)   |    |
| (Al,Fe)1-O1     | 1.707(4) |    |
| (Al,Fe)1-O2     | 1.782(4) | 3x |
| Al2-O2          | 1.732(3) | 4x |
| (Al,Fe)1-O(av.) | 1.763    |    |

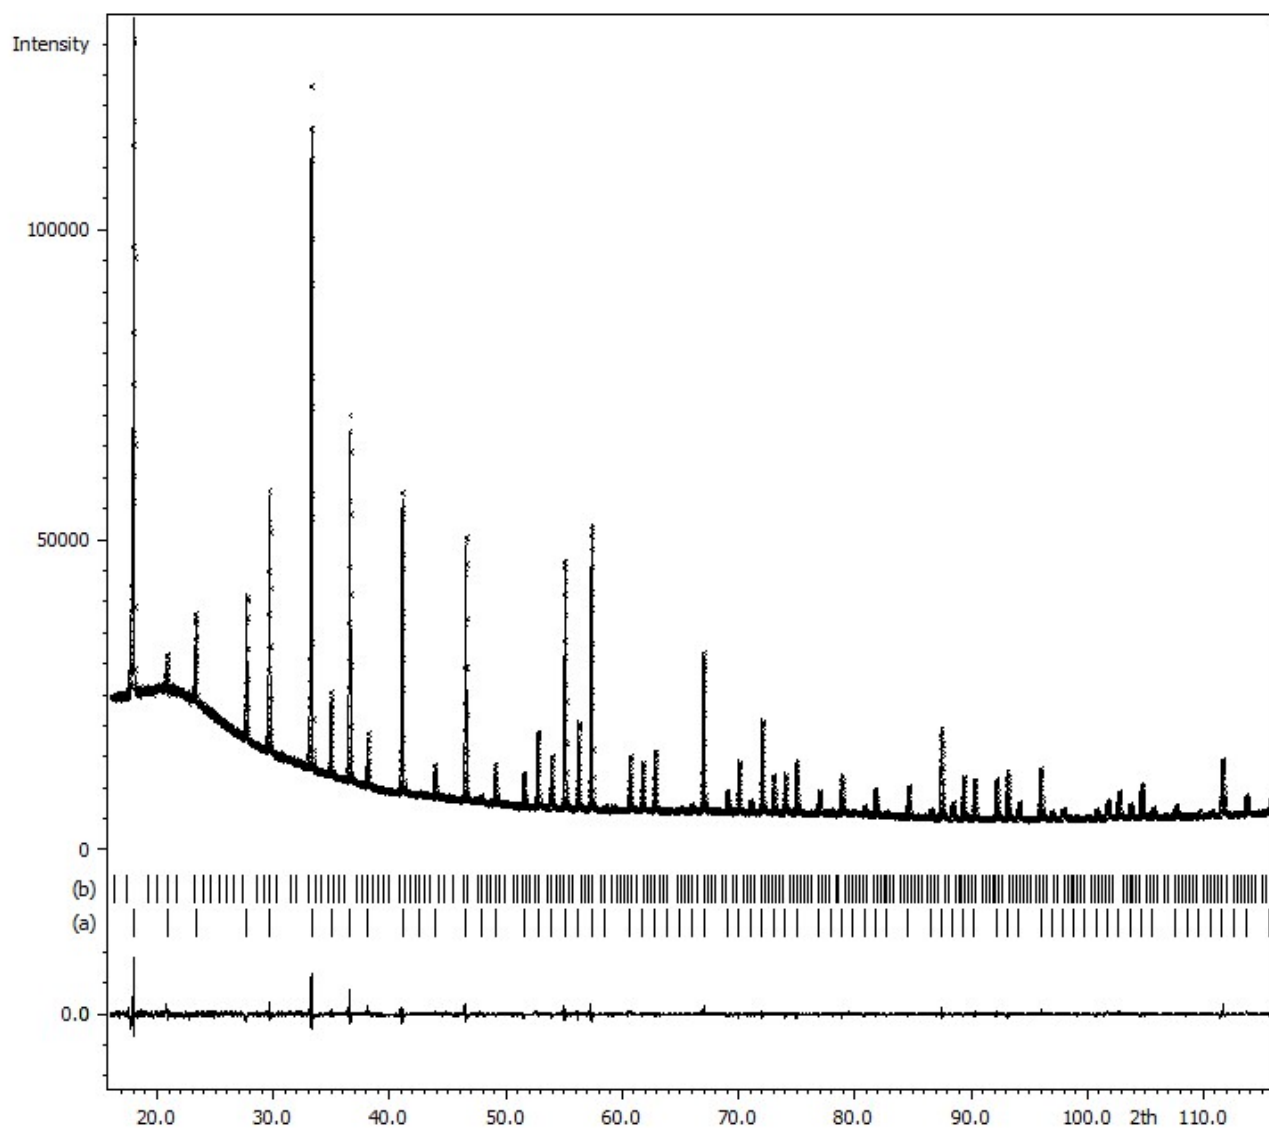

**Figure S3.** Powder X-ray diffraction pattern of  $\text{Ca}_{12}\text{Al}_{13.75}\text{Fe}_{0.25}\text{O}_{33}$  (Sample CAF25). Observed (crosses), calculated (solid line) and difference (solid line below) plots. Positions of Bragg reflections are indicated by vertical bars underneath. (a) the main phase; (b) admixture of  $\text{Ca}_3\text{Al}_2\text{O}_6$ , 1.0 wt. %.

**Table S7.** Crystal structure refinement data for CAF25.

|                                                                            |                                 |
|----------------------------------------------------------------------------|---------------------------------|
| Temperature (K)                                                            | 293 K                           |
| Wavelength (Å)                                                             | 1.5406                          |
| Space group                                                                | <i>I</i> -43 <i>d</i> (no. 220) |
| <i>a</i> (Å)                                                               | 11.9926(1)                      |
| <i>V</i> (Å <sup>3</sup> )                                                 | 1724.80(1)                      |
| <i>Z</i>                                                                   | 2                               |
| 2θ range (deg.)                                                            | 16 – 116                        |
| <i>R</i> <sub>wp</sub>                                                     | 0.020                           |
| <i>R</i> <sub>all</sub>                                                    | 0.020                           |
| Δ <i>F</i> <sub>max</sub> , Δ <i>F</i> <sub>min</sub> (e Å <sup>-3</sup> ) | 0.22, -0.23                     |

**Table S8.** Atomic parameters and thermal displacement parameters (Å<sup>2</sup>) for CAF25.

| Atom | Wyck.       | Occ.     | <i>x</i>    | <i>y</i>    | <i>z</i>    | <i>U</i> <sub>iso</sub> |
|------|-------------|----------|-------------|-------------|-------------|-------------------------|
| Ca1  | 24 <i>d</i> | 0.89(1)  | 0.8899(3)   | 0           | 3/4         | 0.0010(7)               |
| Al1  | 16 <i>c</i> | 0.971(9) | 0.01821(13) | 0.01821(13) | 0.01821(13) | 0.0074(12)              |
| Al2  | 12 <i>b</i> |          | 1.00000     | -1/4        | 5/8         | 0.0007(9)               |
| O1   | 16 <i>c</i> |          | 0.9357(3)   | -0.0643(3)  | 0.9357(3)   | 0.006(2)                |
| O2   | 48 <i>e</i> |          | 0.9015(3)   | -0.1921(2)  | 0.7131(3)   | 0.001(1)                |
| O3   | 48 <i>e</i> | 0.030(4) | 0.772(18)   | 0.114(16)   | -0.057(10)  | 0.0300                  |
| Ca2  | 24 <i>d</i> | 0.11(1)  | 0.946(3)    | 0           | 3/4         | 0.017(8)                |
| Fe1  | 16 <i>c</i> | 0.029(9) | 0.01821(13) | 0.01821(13) | 0.01821(13) | 0.0074(12)              |

**Table S9.** Selected interatomic distances (Å) in the crystal structure of CAF25.

|                 |          |    |
|-----------------|----------|----|
| Ca1-O1          | 2.420(4) | 2x |
| Ca1-O2          | 2.350(3) | 2x |
| Ca1-O2          | 2.525(4) | 2x |
| Ca2-O1          | 2.360(4) | 2x |
| Ca2-O2          | 2.406(8) | 2x |
| Ca2-O3          | 2.1(2)   |    |
| (Al,Fe)1-O1     | 1.714(4) |    |
| (Al,Fe)1-O2     | 1.794(4) | 3x |
| Al2-O2          | 1.730(3) | 4x |
| (Al,Fe)1-O(av.) | 1.774    |    |

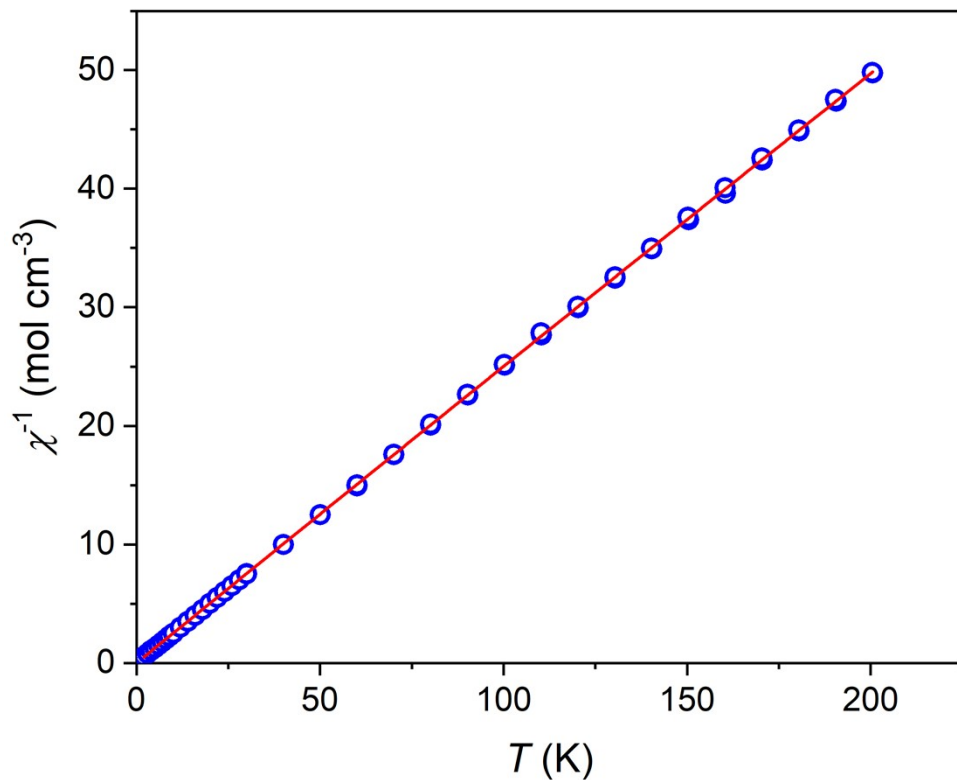

**Figure S4.** Temperature dependence of reciprocal susceptibility per mol of Fe in CAF5. Symbols – experimental data. Line – fit with the Curie-Weiss law.

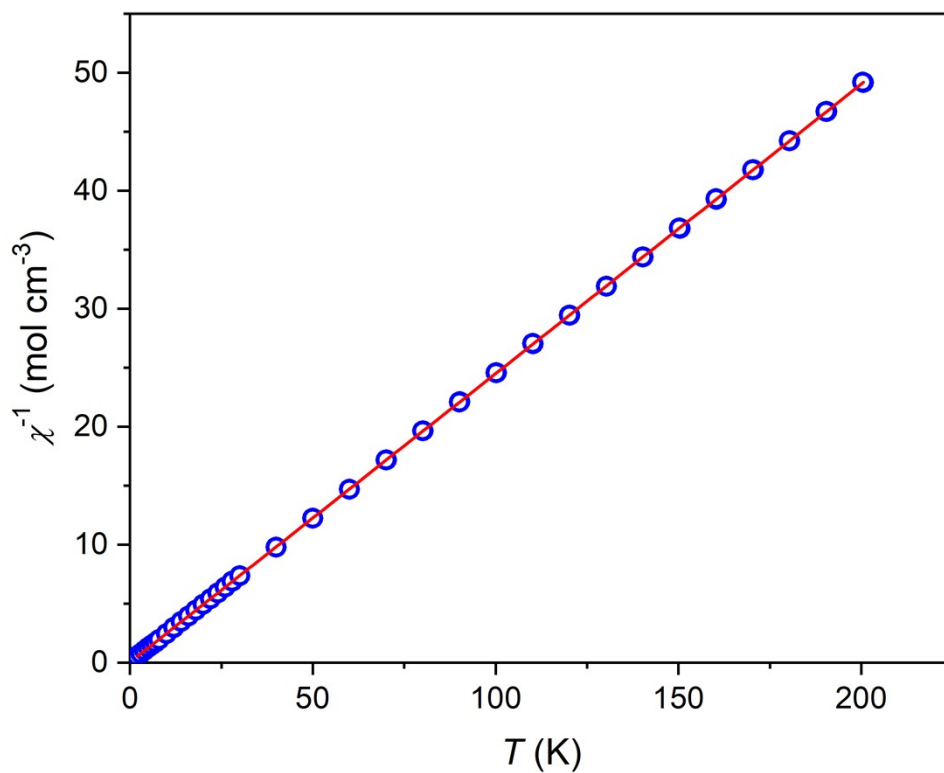

**Figure S5.** Temperature dependence of reciprocal susceptibility per mol of Fe in CAF25. Symbols – experimental data. Line – fit with the Curie-Weiss law.



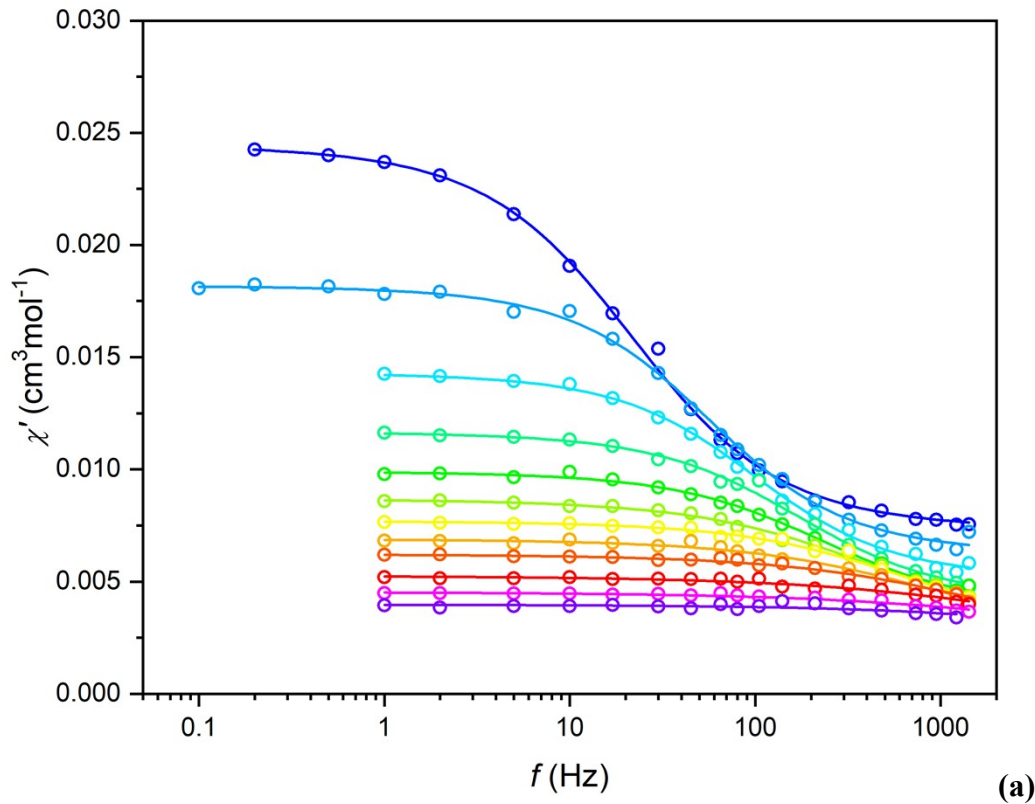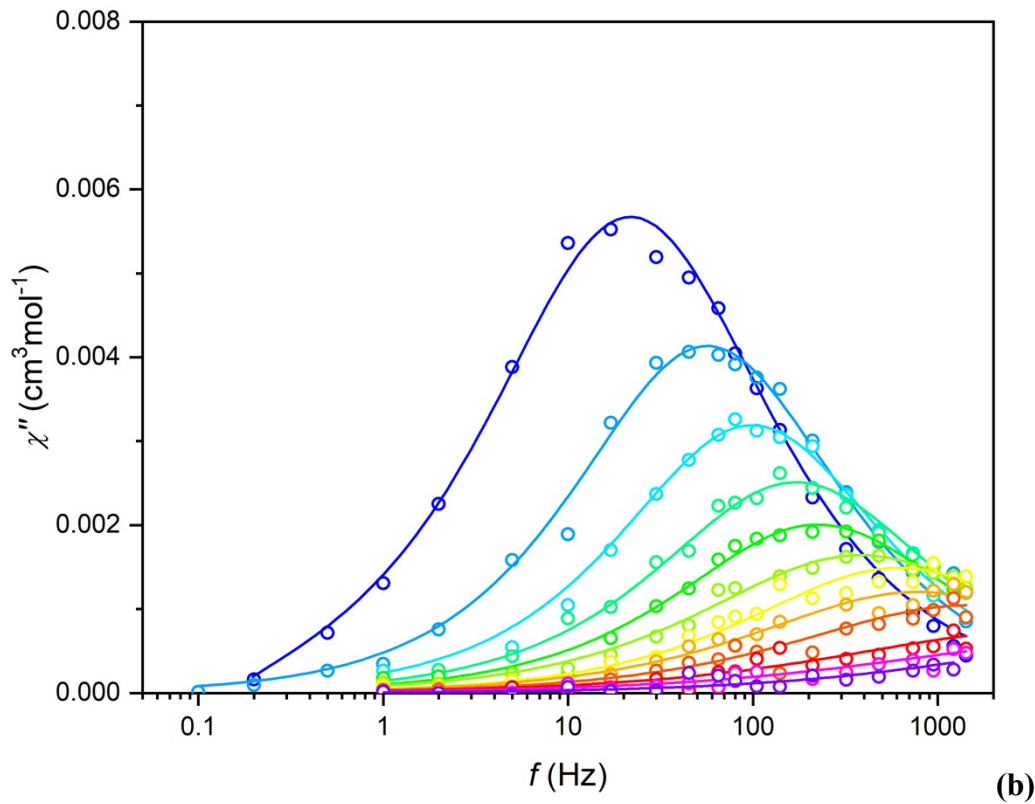

**Figure S6.** Frequency dependence of ac susceptibility per mol of  $\text{Ca}_{12}\text{Al}_{14}\text{O}_{33}$  in CAF0 at temperatures 2 – 10 K (1 K step), 12 K, 14K (color codes, blue-yellow-red-violet) under a dc magnetic field of 4 kOe. Symbols – experimental points, lines – fitting. (a) – in-phase susceptibility  $\chi'$ , (b) – out-of-phase susceptibility  $\chi''$ .

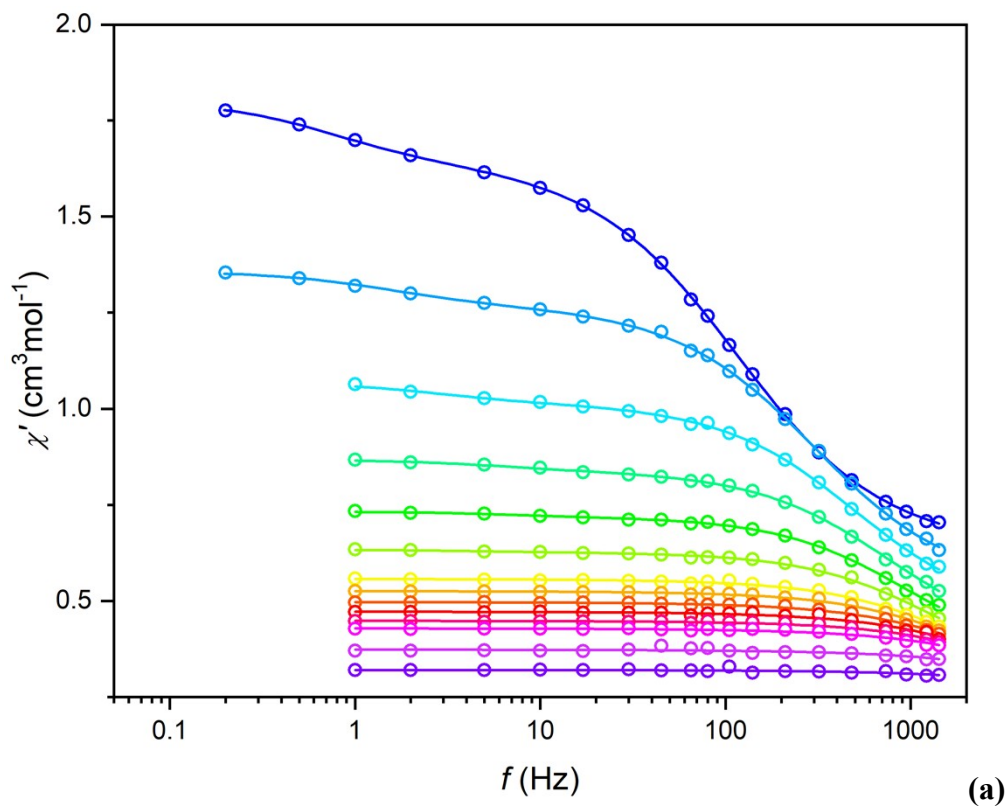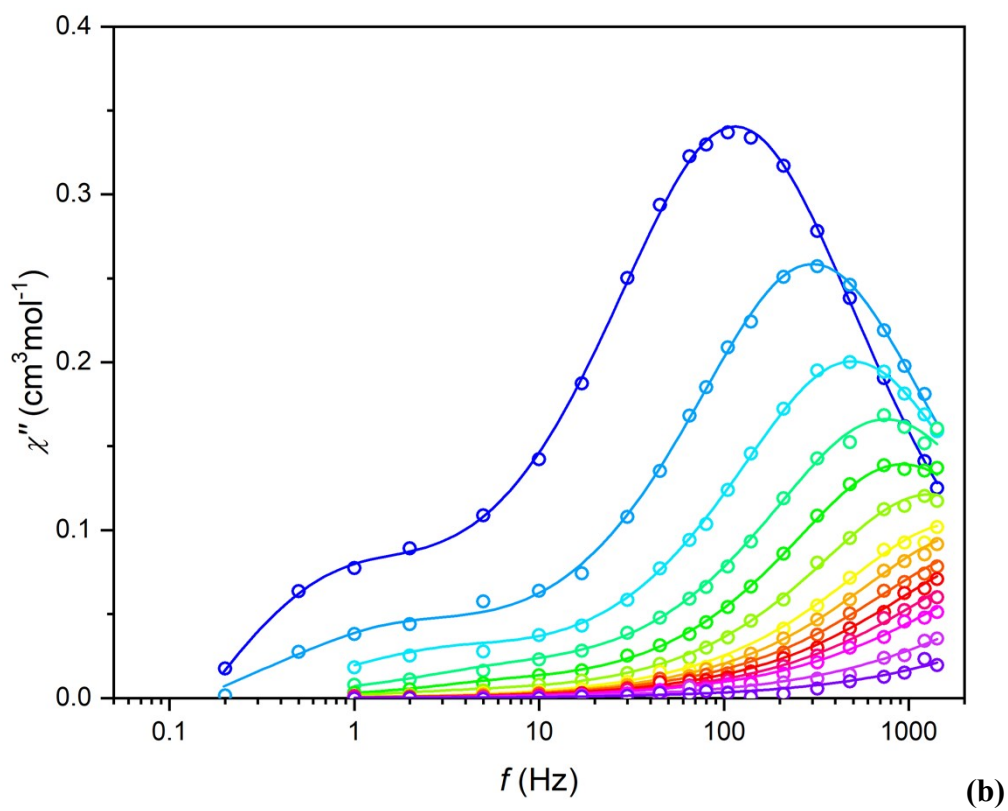

**Figure S7.** Frequency dependence of ac susceptibility per mol of Fe in CAF5 at temperatures 2 – 7 K (1 K step), 8.0 – 10.5 K (0.5 K step), 12 K, 14K (color codes, blue-yellow-red-violet) under a dc magnetic field of 4 kOe. Symbols – experimental points, lines – fitting. (a) – in-phase susceptibility  $\chi'$ ; (b) – out-of-phase susceptibility  $\chi''$ .

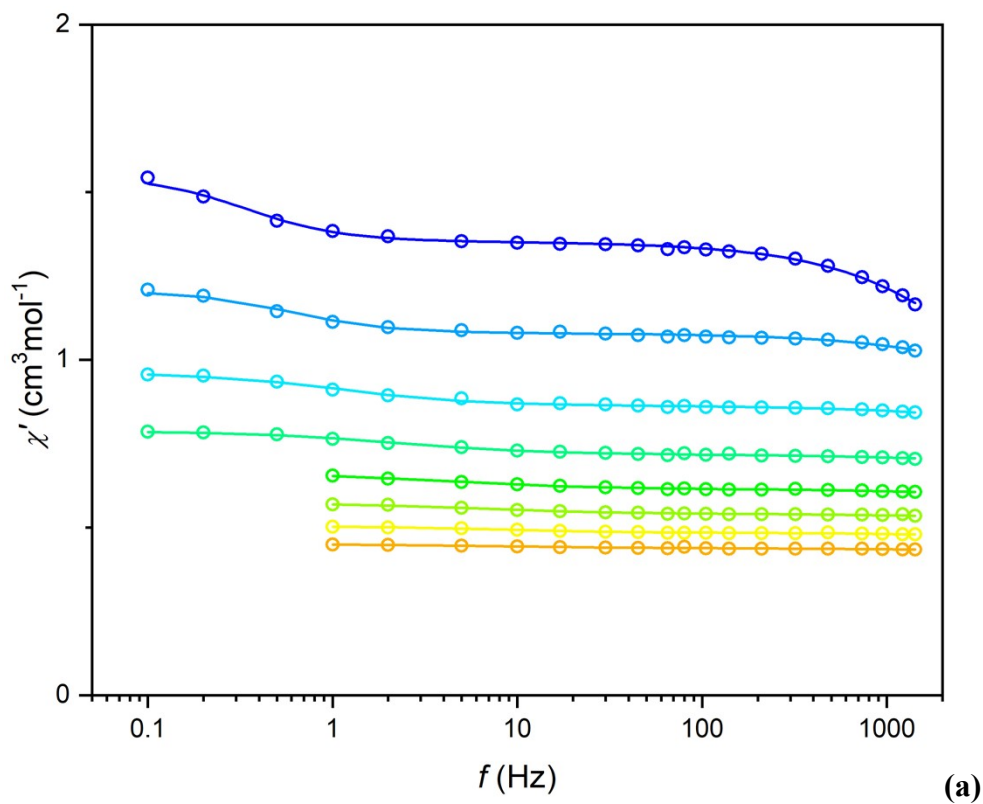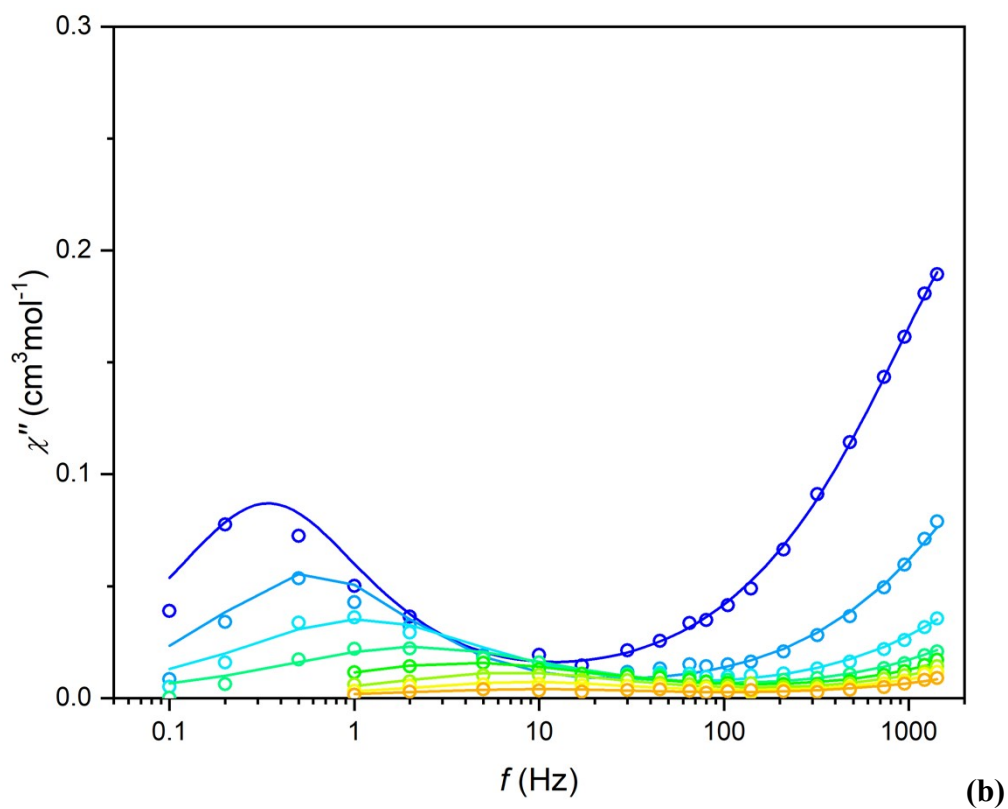

**Figure S8.** Frequency dependence of ac susceptibility per mol of Fe in CAF25 at temperatures 2 – 9 K (1 K step, color codes, blue-yellow-orange) under a dc magnetic field of 4 kOe. Symbols – experimental points, lines – fitting. (a) – in-phase susceptibility  $\chi'$ ; (b) – out-of-phase susceptibility  $\chi''$ .

## Electronic structure data

**Table S10.** Crystal field parameters in Wybourne notation derived using the program CONCORD for Fe<sup>3+</sup> using experimental atomic coordinates of the coordination polyhedron (from Table S8) for full tetrahedron O1+3O2 (**I**), for O1 only (**II**), for 3O2 only (**III**) (z-axis along trigonal axis).

| Parameter       | <b>I</b> , value (cm <sup>-1</sup> ) | <b>II</b> , value (cm <sup>-1</sup> ) | <b>III</b> , value (cm <sup>-1</sup> ) |
|-----------------|--------------------------------------|---------------------------------------|----------------------------------------|
| B <sub>20</sub> | 38578.30                             | 76521.66                              | -37943.36                              |
| B <sub>22</sub> | 0                                    | 0                                     | 0                                      |
| B <sub>40</sub> | 8669.67                              | 17694.85                              | -9025.18                               |
| B <sub>42</sub> | 0                                    | 0                                     | 0                                      |
| B <sub>43</sub> | -20068.82                            | 0                                     | -20068.82                              |
| B <sub>44</sub> | 0                                    | 0                                     | 0                                      |

**Table S11.** Modeling of the Fe<sup>3+</sup> electronic structure with the CONDON program using crystal field parameters listed in Table S10. Energies and magnetic moments of all electronic states (Kramers doublets) derived from the 3d<sup>5</sup> configuration.

| Energy (cm <sup>-1</sup> ) |                  | $-\mu_z$ ( $\mu_B$ ) | $-\mu_x$ ( $\mu_B$ ) |
|----------------------------|------------------|----------------------|----------------------|
| 0                          | ( $M_s = -5/2$ ) | -4.995               | -0.1431              |
| 5.821E-11                  | ( $M_s = 5/2$ )  | 4.995                | -0.1428              |
| 3.262                      | ( $M_s = -3/2$ ) | -2.997               | -0.3829              |
| 3.262                      | ( $M_s = 3/2$ )  | 2.997                | -0.2635              |
| 4.869                      | ( $M_s = -1/2$ ) | -0.9988              | -2.472               |
| 4.869                      | ( $M_s = 1/2$ )  | 0.9988               | 3.405                |
| 6399                       |                  | -4.428               | -0.02746             |
| 6399                       |                  | 4.428                | 0.0234               |
| 6523                       |                  | -2.392               | -0.01565             |
| 6523                       |                  | 2.392                | 0.01531              |
| 6683                       |                  | -0.3653              | 5.318E-4             |
| 6683                       |                  | 0.3653               | 5.956E-4             |
| 6857                       |                  | -1.662               | -0.01014             |
| 6857                       |                  | 1.662                | 0.01296              |
| 9800                       |                  | -0.7375              | -0.5423              |
| 9800                       |                  | 0.7374               | 0.5394               |
| 9833                       |                  | -1.461               | 0.00102              |
| 9833                       |                  | 1.461                | 0.00137              |
| 10830                      |                  | -1.094               | -1.941               |
| 10830                      |                  | 1.093                | 1.939                |
| 11030                      |                  | -3.185               | 8.987E-4             |
| 11030                      |                  | 3.184                | 9.001E-4             |
| 11870                      |                  | -0.9604              | -1.704               |
| 11870                      |                  | 0.9602               | 1.705                |

|       |         |           |
|-------|---------|-----------|
| 12720 | -4.015  | -0.00441  |
| 12720 | 4.015   | 0.00204   |
| 12970 | -2.05   | -3.111E-4 |
| 12970 | 2.05    | -2.622E-4 |
| 13230 | -0.1338 | -0.5622   |
| 13230 | 0.1337  | 0.5633    |
| 13500 | -1.824  | -0.521    |
| 13500 | 1.824   | 0.5228    |
| 13600 | -0.8865 | -2.062    |
| 13600 | 0.8868  | 2.019     |
| 13610 | -2.666  | 0.02129   |
| 13610 | 2.667   | 0.0218    |
| 19830 | -0.7639 | -6.821E-4 |
| 19830 | 0.7638  | -6.19E-4  |
| 19960 | -1.398  | -0.2263   |
| 19960 | 1.398   | 0.2273    |
| 20890 | -0.7172 | -1.345    |
| 20890 | 0.7146  | 1.338     |
| 20930 | -1.417  | -0.0011   |
| 20930 | 1.417   | -8.636E-4 |
| 21020 | -0.9473 | -1.415    |
| 21020 | 0.9497  | 1.418     |
| 21030 | -3.39   | -0.00392  |
| 21030 | 3.39    | 0.00826   |
| 21650 | -1.279  | -1.138    |
| 21650 | 1.279   | 1.138     |
| 22210 | -1.337  | -8.277E-4 |
| 22210 | 1.337   | -6.619E-4 |
| 22330 | -0.5982 | -0.2863   |
| 22330 | 0.5982  | 0.2876    |
| 22770 | -0.9032 | -1.014    |
| 22770 | 0.9033  | 1.014     |
| 23710 | -0.917  | -1.092    |
| 23710 | 0.9169  | 1.092     |
| 24680 | -2.9    | -0.00344  |
| 24680 | 2.9     | -0.00343  |
| 24750 | -0.9783 | -1.918    |
| 24750 | 0.9783  | 1.925     |
| 25610 | -3.408  | -0.1034   |
| 25610 | 3.406   | -0.1031   |
| 25620 | -5.446  | 0.04746   |
| 25620 | 5.417   | 0.1328    |
| 25630 | -0.6443 | -1.605    |
| 25630 | 0.6659  | 1.622     |
| 25660 | -0.8953 | -1.676    |
| 25660 | 0.9023  | 1.684     |
| 25760 | -2.511  | 6.213E-4  |
| 25760 | 2.512   | 6.292E-4  |
| 26160 | -0.1774 | -0.00424  |
| 26160 | 0.1774  | 0.00451   |
| 26670 | -1.054  | -0.8156   |

|       |          |           |
|-------|----------|-----------|
| 26670 | 1.053    | 0.8157    |
| 27620 | -2.039   | -0.3375   |
| 27620 | 2.039    | 0.3369    |
| 27940 | -0.3266  | -0.0017   |
| 27940 | 0.3266   | -0.00163  |
| 27990 | -1.93    | -0.03423  |
| 27990 | 1.93     | 0.02184   |
| 28020 | -0.487   | -1.562    |
| 28020 | 0.4565   | 1.494     |
| 28030 | -0.09221 | 0.0358    |
| 28030 | 0.09237  | 0.03724   |
| 28060 | -2.368   | -1.509    |
| 28060 | 2.4      | 1.519     |
| 28560 | -0.7046  | -1.134    |
| 28560 | 0.705    | 1.136     |
| 29270 | -3.04    | -0.00382  |
| 29270 | 3.04     | -0.0038   |
| 29330 | -1.014   | -1.937    |
| 29330 | 1.014    | 1.944     |
| 29890 | -1.123   | -1.127    |
| 29890 | 1.124    | 1.127     |
| 31400 | -2.105   | -5.704E-4 |
| 31400 | 2.105    | -5.379E-4 |
| 31600 | -0.05876 | -0.1631   |
| 31600 | 0.05869  | 0.164     |
| 32480 | -0.9203  | -1.812    |
| 32480 | 0.9204   | 1.809     |
| 32620 | -2.791   | 0.00177   |
| 32620 | 2.791    | 0.00178   |
| 33260 | -2.68    | -0.00895  |
| 33260 | 2.68     | -0.00634  |
| 33270 | -0.3098  | 0.00733   |
| 33270 | 0.3098   | 0.00775   |
| 34210 | -2.47    | -0.00258  |
| 34210 | 2.47     | 0.00226   |
| 34760 | -0.6183  | 8.89E-5   |
| 34760 | 0.6182   | 9.253E-5  |
| 35450 | -0.4924  | -1.183    |
| 35450 | 0.4883   | 1.183     |
| 35620 | -1.596   | -1.054    |
| 35620 | 1.6      | 1.054     |
| 37180 | -1.09    | -0.1453   |
| 37180 | 1.09     | 0.1427    |
| 37240 | -0.5061  | 0.00101   |
| 37240 | 0.5063   | 0.00122   |
| 37730 | -0.8483  | -1.214    |
| 37730 | 0.8478   | 1.214     |
| 38360 | -1.574   | -0.117    |
| 38360 | 1.574    | 0.1077    |
| 38380 | -3.683   | 0.00476   |
| 38380 | 3.683    | 0.00513   |

|       |          |           |
|-------|----------|-----------|
| 38640 | -2.12    | -0.4227   |
| 38640 | 2.119    | 0.4182    |
| 38760 | -0.1313  | -0.3657   |
| 38760 | 0.1314   | 0.3639    |
| 38880 | -1.813   | 6.057E-4  |
| 38880 | 1.813    | 0.00122   |
| 39000 | -3.783   | 0.00155   |
| 39000 | 3.783    | 0.003     |
| 40060 | -1.172   | -1.127    |
| 40060 | 1.172    | 1.128     |
| 41320 | -0.9854  | -1.87     |
| 41320 | 0.9855   | 1.813     |
| 41330 | -2.954   | 0.02798   |
| 41330 | 2.954    | 0.02877   |
| 42310 | -0.8993  | -1.084    |
| 42310 | 0.8998   | 1.084     |
| 43800 | -1.003   | -0.4758   |
| 43800 | 1.003    | 0.474     |
| 44010 | -0.9435  | 1.54E-4   |
| 44010 | 0.9434   | 2.347E-4  |
| 44420 | -0.4385  | -2.668E-4 |
| 44420 | 0.4385   | -2.572E-4 |
| 44510 | -0.9826  | -0.4031   |
| 44510 | 0.9826   | 0.4042    |
| 44840 | -2.325   | -0.03815  |
| 44840 | 2.326    | 0.03876   |
| 46180 | -0.9541  | -0.9206   |
| 46180 | 0.9541   | 0.9205    |
| 46570 | -0.04907 | -7.585E-4 |
| 46570 | 0.04916  | -7.082E-4 |
| 46700 | -2.038   | -0.0332   |
| 46700 | 2.038    | 0.03484   |
| 49420 | -2.062   | -6.675E-4 |
| 49420 | 2.061    | -6.297E-4 |
| 49570 | -3.838   | -0.01569  |
| 49570 | 3.837    | 0.0169    |
| 51500 | -2.76    | -0.01883  |
| 51500 | 2.759    | -0.01891  |
| 51520 | -0.897   | -1.934    |
| 51520 | 0.8964   | 1.971     |
| 51830 | -2.075   | -0.2136   |
| 51830 | 2.075    | 0.2101    |
| 51860 | -0.8578  | -0.1073   |
| 51860 | 0.8579   | 0.1034    |
| 51900 | -1.076   | 0.00286   |
| 51900 | 1.076    | 0.00308   |
| 52160 | -0.1738  | -0.1217   |
| 52160 | 0.1737   | 0.1208    |
| 52450 | -1.838   | 3.182E-4  |
| 52450 | 1.838    | 3.514E-4  |
| 52750 | -3.825   | -0.00283  |

|       |          |           |
|-------|----------|-----------|
| 52750 | 3.825    | 0.00466   |
| 53650 | -1.103   | -2.016    |
| 53650 | 1.104    | 2.006     |
| 53710 | -3.273   | 0.00516   |
| 53710 | 3.274    | 0.00518   |
| 54160 | -1.86    | -0.9701   |
| 54160 | 1.859    | 0.97      |
| 54770 | -0.1148  | -0.07988  |
| 54770 | 0.1155   | 0.07925   |
| 54870 | -1.296   | -0.01212  |
| 54870 | 1.296    | -0.00922  |
| 54880 | -0.1937  | -0.683    |
| 54880 | 0.194    | 0.7045    |
| 55220 | -0.6222  | -0.1315   |
| 55220 | 0.6228   | 0.1312    |
| 55450 | -1.188   | 4.119E-4  |
| 55450 | 1.188    | 4.388E-4  |
| 56580 | -0.923   | -0.9446   |
| 56580 | 0.9231   | 0.9449    |
| 59670 | -0.3563  | -0.00446  |
| 59670 | 0.3563   | -0.00422  |
| 59690 | -2.36    | -0.02332  |
| 59690 | 2.36     | 0.03177   |
| 61030 | -1.261   | -0.0012   |
| 61030 | 1.261    | -9.5E-4   |
| 61260 | -0.7463  | -3.787E-4 |
| 61260 | 0.7463   | -3.461E-4 |
| 61340 | -0.4557  | -1.056    |
| 61340 | 0.4543   | 1.057     |
| 61500 | -2.546   | -0.1073   |
| 61500 | 2.546    | 0.108     |
| 61740 | -4.663   | -0.1071   |
| 61740 | 4.663    | 0.1093    |
| 62880 | -1.326   | -1.105    |
| 62880 | 1.327    | 1.105     |
| 64670 | -1.884   | -5.102E-4 |
| 64670 | 1.884    | -3.923E-4 |
| 64890 | -0.09962 | -0.1408   |
| 64890 | 0.09963  | 0.1416    |
| 66480 | -1.072   | -0.7696   |
| 66480 | 1.072    | 0.7699    |
| 68790 | -0.261   | -0.02739  |
| 68790 | 0.2611   | 0.02709   |
| 69350 | -1.762   | 1.661E-4  |
| 69350 | 1.762    | 1.682E-4  |
| 71600 | -1.267   | -0.9671   |
| 71600 | 1.266    | 0.967     |
| 73530 | -0.7361  | -0.9532   |
| 73530 | 0.7368   | 0.9532    |
| 75330 | -1.31    | -0.00526  |
| 75330 | 1.309    | -0.00478  |



|        |          |           |
|--------|----------|-----------|
| 75350  | -0.6448  | -0.00139  |
| 75350  | 0.6447   | 0.0114    |
| 78170  | -0.06805 | -0.06224  |
| 78170  | 0.0675   | 0.0617    |
| 78430  | -1.289   | 3.402E-4  |
| 78430  | 1.289    | 3.997E-4  |
| 79770  | -0.3502  | -0.04522  |
| 79770  | 0.3508   | 0.04488   |
| 80220  | -3.045   | 2.307E-4  |
| 80220  | 3.045    | 2.391E-4  |
| 81160  | -0.9942  | -0.9787   |
| 81160  | 0.9942   | 0.9787    |
| 88380  | -1.004   | -0.9722   |
| 88380  | 1.004    | 0.9722    |
| 98320  | -0.8963  | -2.32E-4  |
| 98320  | 0.8963   | -2.165E-4 |
| 98710  | -2.891   | -5.991E-4 |
| 98710  | 2.891    | 0.00106   |
| 101600 | -0.9983  | -1.041    |
| 101600 | 0.9983   | 1.041     |
| 116100 | -1.936   | -2.931E-4 |
| 116100 | 1.936    | -1.756E-4 |
| 116400 | -0.06707 | -0.04757  |
| 116400 | 0.06707  | 0.0481    |

---
